# Supplementary material for: Sedimentary insights into organic matter alteration in Arctic Alaska’s saline permafrost
Source: Copernicus journal article supplement (doi:10.5194/egusphere-2025-3727), 2025-08-20
Supplement: Supplementary file 1 [file egusphere-2025-3727-supplement.pdf]

1 **Supplement to Seemann et al.**

2

3

4 Table S1: Characteristics of coring sites on the Barrow Peninsula.

|                                                             | Upland     | DLB        | West Twin Lake | East Twin Lake* | Thermokarst lagoon | Elson lagoon |
|-------------------------------------------------------------|------------|------------|----------------|-----------------|--------------------|--------------|
| Coring date                                                 | 2022.04.21 | 2022.04.22 | 2022.04.19     | 2022.04.20      | 2022.04.20         | 2022.04.21   |
| Latitude                                                    | 71.27637   | 71.2772    | 71.27396       | 71.2753         | 71.2632            | 71.29008212  |
| Longitude                                                   | -156.45296 | -156.44311 | -156.49699     | -156.45296      | -156.42355         | -156.47186   |
| Elevation (m a.s.l.)                                        | 3.3        | 2.9        | 2.0            | 2.4             | 0.0                | 0.0          |
| Area (ha)                                                   | n/a        | 105.1      | 130.6          | 127.6           | 80.1               | 12,500       |
| Sediment core length (m)                                    | 2.04       | 1.42       | 0.23           | 1.38*           | 0.46               | 1.10         |
| Sediment physical state                                     | frozen     | frozen     | unfrozen       | unfrozen        | unfrozen           | semi-frozen  |
| Coring device                                               | SIPRE      | SIPRE      | Push           | Vibra           | SIPRE              | SIPRE        |
| Waterbody depth (m)                                         | n/a        | n/a        | 1.81           | 1.75            | 0.94               | 1.16         |
| Ice thickness (m)                                           | n/a        | n/a        | 1.75           | 1.46            | 0.94               | 1.16         |
| Total water depth (m)                                       | n/a        | n/a        | 1.81           | 1.75            | 0.94               | 1.16         |
| Liquid water temperature (°C)                               | n/a        | n/a        | 0.04           | 0.30            | -12.7              | -            |
| Liquid water electrical conductivity (mS cm <sup>-1</sup> ) | n/a        | n/a        | 0.002          | 12.0            | 20.2               | -            |

5 \*East Twin Lake core 118 cm compressed

Table S2: Upland core photograph and description (picture: Fabian Seemann). In the top-left of the photograph, the top of the core is visible and in the bottom-right the core bottom is located. The core is split in halves and cleaned in a climate chamber to reveal colors, structures and properties.

| Photograph                                                                         | Depth (cm) | Description                                                                                                                                 |
|------------------------------------------------------------------------------------|------------|---------------------------------------------------------------------------------------------------------------------------------------------|
|  | 0-3        | Recent vegetation, dark brown.                                                                                                              |
|                                                                                    | 3-12       | Light brown layers, ice lenses of 1 cm length between 4-8 cm, massive ice between 8-12 cm, silty, peat band of 2 cm diameter at 7 cm depth. |
|                                                                                    | 12-38      | Ice-rich, dark/light brown cryoturbated, organic-rich, few macro plant remains at 27 cm, silty peat.                                        |
|                                                                                    | 38-69      | Silty light grey, ataxitic, macro plant remains.                                                                                            |
|                                                                                    | 69-83      | ice-rich, dark brown, organic-rich, cryoturbation at 77-82 cm.                                                                              |
|                                                                                    | 83-133     | Light-grey silty, no organic remains visible, very ice-rich, reticular ice lenses.                                                          |
|                                                                                    | 133-174    | Grey (darker than above), silty, reticula and lenticula ice lenses, ice bands.                                                              |
|                                                                                    | 174-193    | Darker than above, very ice-rich (50 %), silty, thick lenses (1 cm chaotically orientated), no organics visible.                            |
|                                                                                    | 193-204    | Ataxitic with sediment inclusions.                                                                                                          |

Table S3: West Twin Lake core photograph and description (picture: Fabian Seemann).

| Photograph                                                                          | Depth (cm) | Description                                                                             |
|-------------------------------------------------------------------------------------|------------|-----------------------------------------------------------------------------------------|
|  | 0-23       | Blackish brown, poorly decomposed organic matter, no minerals visible, drier downwards. |

15 Table S4: East Twin Lake core photograph and description (pictures: Fabian Seemann). The core is compressed  
16 by 118 cm due to vibration during coring.

| Photograph                                                                          | Depth (cm) | Description                                                                                                   |
|-------------------------------------------------------------------------------------|------------|---------------------------------------------------------------------------------------------------------------|
|   | 0-15       | Dark brown, macro-remains, poorly decomposed, high water content, no minerals visible.                        |
|                                                                                     | 15-22      | Lighter brown to grey-ish, fine minerals, poorly decomposed organics, macro-remains.                          |
|                                                                                     | 22-27      | Black/brown (organics), grey-blue-ish (minerals).                                                             |
|                                                                                     | 27-51      | High water content, fine sand, silty, yellow-ish, grey, few macro remains.                                    |
|                                                                                     | 51-60      | As above but more oxidized, more orange, lower water content, woody macro remains at 59 cm.                   |
|                                                                                     | 60-80      | Black-ish, dark grey to medium grey, less water content, no plant macro remains, visible fines (clayey silt). |
|                                                                                     | 80-93      | Dark grey-ish, black, coarser as above, oxidized, organic inclusions (brown grey).                            |
|                                                                                     | 93-108     | Continuation of brownish-grey silty material.                                                                 |
|                                                                                     | 108-128    | Dark, blackish-grey, silty and denser.                                                                        |
|                                                                                     | 128-138    | Same color but less dense, more water due to higher pore space.                                               |
|  |            |                                                                                                               |

19 Table S5: Drained Lake Basin core photograph and description (pictures: Fabian Seemann).

| Photograph                                                                         | Depth (cm) | Description                                                                                                                                              |
|------------------------------------------------------------------------------------|------------|----------------------------------------------------------------------------------------------------------------------------------------------------------|
|  | 0-14       | Water saturated peat, 8-14 cm partly decomposed peat, black/brown.                                                                                       |
|                                                                                    | 14-18      | Less water saturated, more peat than water, first sediment inclusions.                                                                                   |
|                                                                                    | 18-21      | Transition peat to silt, brown grey, diagonal macro-lense (3*0.5 cm horizontal wavy micro-lenses).                                                       |
|                                                                                    | 21-29      | Brown grey, silt, horizontal macro-lense 1*0.5 cm, two large vertical cracks (6 cm long, 0.5 cm wide).                                                   |
|                                                                                    | 29-33      | Pure peat (sec. Lake phase prob.), brown to light brown.                                                                                                 |
|                                                                                    | 33-79      | Ich-rich, lenticula (max. 0.5 cm thick), also reticula structure, at 39 cm (1*1 cm) organic inclusion, at 45-52 cm and 62-71 thicker ice lense.          |
|                                                                                    | 79-93      | Cryoturbated horizon, black-brown (org.)-grey (sandy silt) turbations, 90-93 cm black band, thin ice-lenses 1 mm, 3 cm long.                             |
|                                                                                    | 93-97      | Sandy-silt band, ice band 1 mm horizontal 5 cm long, more smaller ice bands vertical + horizontal, at 96-97 cm black circular structure (1 cm diameter). |
|                                                                                    | 97-104     | Brown matrix with macro remains, sandy silt, mixed with black (highly decomposed) fine silts.                                                            |
|                                                                                    | 104-107    | Sandy silt, grey, macro remains, few micro-lenses.                                                                                                       |
|                                                                                    | 107-115    | Dark black, highly decomposed.                                                                                                                           |
|                                                                                    | 115-122    | Brown grey, sandy silt, black dots of 0.5 cm, structureless.                                                                                             |
|                                                                                    | 122-131    | As above, less black, ice-rich along the core-side.                                                                                                      |
|                                                                                    | 131-142    | Sandy silt, with micro-lenses (horizontal, few vertical), like above concerning ice content.                                                             |

22 Table S6: Semi-open thermokarst lagoon core photograph and description (pictures: Fabian Seemann).

| Photograph                                                                         | Depth (cm) | Description                                                       |
|------------------------------------------------------------------------------------|------------|-------------------------------------------------------------------|
|  | 0-2        | Grey, brown, fines.                                               |
|                                                                                    | 2-9        | Black, loose organics, ice-bands without orientation 1 mm.        |
|                                                                                    | 9-11       | Brown grey, fines, organic-rich, vertical ice-bands 1 mm.         |
|                                                                                    | 11-12      | Grey, silt band.                                                  |
|                                                                                    | 12-23      | Like at 2-9 cm, fine laminated, black, organic-rich.              |
|                                                                                    | 23-31      | Laminated with wider (4-5 mm), vertical ice-bands, greyish black. |
|                                                                                    | 31-40      | Laminated, wider than above, no ice-bands.                        |
|                                                                                    | 40-43      | Black, brown, laminated.                                          |
|                                                                                    | 43-46      | Black dots, not laminated.                                        |
|                                                                                    |            |                                                                   |

23  
24  
25

Table S7: Elson Lagoon core photograph and description (pictures: Fabian Seemann).

| Photograph                                                                         | Depth (cm) |                                                                                                                                             |
|------------------------------------------------------------------------------------|------------|---------------------------------------------------------------------------------------------------------------------------------------------|
|  | 0-6        | Dark brown, fine laminated, un-orientated 2 mm ice-bands.                                                                                   |
|                                                                                    | 6-9        | 3-4 mm thick ice-bands, un-orientated, more ice than above, brown.                                                                          |
|                                                                                    | 9-16       | Unfrozen structureless, dark brown.                                                                                                         |
|                                                                                    | 16-27      | Horizontal laminations, 3-4mm, black, brown, grey, silty; at 16-24 cm horizontal ice bands 1 mm thick, at 24-27 cm un-orientated ice-bands. |
|                                                                                    | 27-31      | 3 laminations: light brown, grey.                                                                                                           |
|                                                                                    | 31-36      | Horizontal ice-bands 2-4 mm wide.                                                                                                           |
|                                                                                    | 36-37      | Finer than above, thin horizontal ice-bands.                                                                                                |
|                                                                                    | 37-44      | Horizontal ice-bands, laminated, coarser than above, silty.                                                                                 |
|                                                                                    | 44-63      | Un-orientated ice-bands 1-3 mm wide, light brown grey, laminations.                                                                         |
|                                                                                    | 63-65      | Very fine laminations, brighter downwards, fine vertical ice-bands.                                                                         |
|                                                                                    | 65-66      | Like at 44-63 cm but darker.                                                                                                                |
|                                                                                    | 66-78      | Ice-bands 1 mm wide from vertical to horizontal (cryoturbated?), dark dots in bright silt.                                                  |
|                                                                                    | 78-93      | Laminations dark black, brown, sand (at 79 cm, 84 cm) microlenses vertical and horizontal (potentially through deformation).                |
|                                                                                    | 93-98      | Sandy silt to silty sand transition, brownish grey, lighter than above.                                                                     |
|                                                                                    | 98-101     | Sand layer, 3 rounded pebbles (diameter 2 cm), 1 pebble of granite (?).                                                                     |
|                                                                                    | 101-110    | Sediment layers of 0.5 cm brown, grey, black, slightly; u-shaped (deformation by corer?), silty sand, sandy silt.                           |

Table S8: Radiocarbon data.

| AWI MICADAS sample ID* | Sample label   | Depth (cm) | Material dated | <sup>14</sup> C age (yr BP) | +/- | Calibrated age 2s range (yr cal BP)** | Mean calibrated age (yr cal BP) |
|------------------------|----------------|------------|----------------|-----------------------------|-----|---------------------------------------|---------------------------------|
| 12524.1.1              | BRW22-UL 5-14  | 7.5        | Plant remains  | -157                        | 54  |                                       | modern                          |
| 12525.1.1              | BRW22-UL 25-30 | 27.5       | Plant remains  | 5,734                       | 69  | 6,392-6,675                           | 6,534                           |
| 12526.1.1              | BRW22-UL 50-55 | 52.5       | Plant remains  | 5,931                       | 72  | 6,604-6,946                           | 6,775                           |
| 12527.1.1              | BRW22-UL 70-80 | 75         | Plant remains  | 6,105                       | 73  | 6,785-7,165                           | 6,975                           |



|           |                   |        |               |        |     |               |        |
|-----------|-------------------|--------|---------------|--------|-----|---------------|--------|
| 12528.1.1 | BRW22-UL 98-106   | 102    | Plant remains | 6,074  | 76  | 6,777-7,159   | 6,968  |
| 12529.1.1 | BRW22-UL 123-128  | 125.5  | Plant remains | 6,394  | 77  | 7,161-7,430   | 7,296  |
| 12530.1.1 | BRW22-UL 180-192  | 186    | Bulk sediment | 11,413 | 32  | 13,179-13,347 | 13,263 |
| 12520.1.1 | BRW22-WTL 3-13    | 8      | Plant remains | 2,285  | 60  | 2,121-2,432   | 2,277  |
| 12521.1.1 | BRW22-ETL 3-13    | 8***   | Plant remains | 2,810  | 64  | 2,765-3,075   | 2,920  |
| 12522.1.1 | BRW22-ETL 70-80   | 75***  | Bulk sediment | 23,542 | 60  | 27,596-27,863 | 27,730 |
| 12523.1.1 | BRW22-ETL 116-126 | 121*** | Bulk sediment | 38,823 | 194 | 42,371-42,761 | 42,566 |
| 12531.1.1 | BRW22-DLB 19-22   | 20.5   | Plant remains | 709    | 57  | 623-729       | 676    |
| 12532.1.1 | BRW22-DLB 26-35   | 30.5   | Plant remains | 1,311  | 30  | 1,242-1,294   | 1,268  |
| 12533.1.1 | BRW22-DLB 50-55   | 52.5   | Plant remains | 2,129  | 107 | 1,865-2,342   | 2,104  |
| 12534.1.1 | BRW22-DLB 70-77   | 73.5   | Plant remains | 9,348  | 87  | 10,255-10,768 | 10,512 |
| 12535.1.1 | BRW22-DLB 105-110 | 107.5  | Plant remains | 8,842  | 36  | 9,723-9,968   | 9,846  |
| 12536.1.1 | BRW22-DLB 131-142 | 136.5  | Bulk sediment | 29,541 | 87  | 33,877-34,376 | 34,127 |
| 12540.1.1 | BRW22-SOL 16-21   | 18.5   | Plant remains | 6,369  | 142 | 6,949-7,514   | 7,232  |
| 12541.1.1 | BRW22-SOL 41-46   | 43.5   | Plant remains | 4,096  | 114 | 4,290-4,860   | 4,575  |
| 12537.1.1 | BRW22-EL 0-4      | 2      | Plant remains | 4,811  | 111 | 5,308-5,753   | 5,531  |
| 12538.1.1 | BRW22-EL 34-39    | 36.5   | Plant remains | 4,694  | 114 | 5,046-5,605   | 5,326  |
| 12539.1.1 | BRW22-EL 74-78    | 76     | Plant remains | 5,312  | 84  | 5,929-6,224   | 6,077  |

---

\* AWI MICADAS sample number based on Mollenhauer et al.(2021).

\*\* Radiocarbon calibration was conducted using Calib 8.20 software and the IntCal 20 calibration curve (Reimer et al., 2020; Stuiver and Reimer, 1993).

\*\*\*East Twin Lake core 118 cm compressed

30  
31  
32  
33  
34  
35  
36

## References

- Mollenhauer, G., Grotheer, H., Gentz, T., Bonk, E., and Hefter, J.: Standard operation procedures and performance of the MICADAS radiocarbon laboratory at Alfred Wegener Institute (AWI), Germany, Nuclear Instruments and Methods in Physics Research Section B: Beam Interactions with Materials and Atoms, 496, 45–51, <https://doi.org/10.1016/j.nimb.2021.03.016>, 2021.
- Reimer, P. J., Austin, W. E. N., Bard, E., Bayliss, A., Blackwell, P. G., Ramsey, C. B., Butzin, M., Cheng, H., Edwards, R. L., Friedrich, M., Grootes, P. M., Guilderson, T. P., Hajdas, I., Heaton, T. J., Hogg, A. G., Hughen, K. A., Kromer, B., Manning, S. W., Muscheler, R., Palmer, J. G., Pearson, C., Plicht, J. van der, Reimer, R. W., Richards, D. A., Scott, E. M., Southon, J. R., Turney, C. S. M., Wacker, L., Adolphi, F., Büntgen, U., Capano, M., Fahrni, S. M., Fogtmann-Schulz, A., Friedrich, R., Köhler, P., Kudsk, S., Miyake, F., Olsen, J., Reinig, F., Sakamoto, M., Sookdeo, A., and Talamo, S.: The IntCal20 Northern Hemisphere Radiocarbon Age Calibration Curve (0–55 cal kBP), Radiocarbon, 62, 725–757, <https://doi.org/10.1017/RDC.2020.41>, 2020.
- Stuiver, M. and Reimer, P. J.: Extended 14C Data Base and Revised CALIB 3.0 14C Age Calibration Program, Radiocarbon, 35, 215–230, <https://doi.org/10.1017/S0033822200013904>, 1993.
